# Supplementary material for: General Medical Outcomes From the Primary and Behavioral Health Care Integration Grant Program
Source: Atypon-hosted journal article supplement (doi:10.1176/appi.ps.201500352), 2016-07-01
Supplement: appi.ps.201500352.ds001.pdf [file appi.ps.201500352.ds001.pdf]

Appendix Table 1. PBHCI consumers (%) with at least one provider contact within one year of enrollment

| Provider type                  | Site 1 |    | Site 2 |    | Site 3 |    | All Other Sites (n=53) |    |
|--------------------------------|--------|----|--------|----|--------|----|------------------------|----|
|                                | N      | %  | N      | %  | N      | %  | N                      | %  |
| Care manager                   | 873    | 88 | 564    | 98 | 144    | 17 | 16,128                 | 69 |
| PC provider                    | 897    | 90 | 501    | 87 | 780    | 89 | 17,313                 | 75 |
| Psychiatrist/psychiatric nurse | 868    | 87 | 358    | 62 | 622    | 71 | 16,802                 | 72 |
| Counselor                      | 743    | 75 | 141    | 25 | 649    | 74 | 11,317                 | 49 |
| Peer specialist                | 150    | 15 | 51     | 8  | 41     | 5  | 5,926                  | 26 |
| Other specialist               | 459    | 46 | 0      | 0  | 115    | 13 | 5,182                  | 22 |

Appendix Table 2. PBHCI consumers (%) with at least one physical health service contact within one year of enrollment

| Type of service       | Site 1 |     | Site 2 |    | Site 3 |    | All Other Sites (n=53) |    |
|-----------------------|--------|-----|--------|----|--------|----|------------------------|----|
|                       | N      | %   | N      | %  | N      | %  | N                      | %  |
| Screening/assessment  | 996    | 100 | 512    | 89 | 780    | 89 | 19,939                 | 86 |
| Referral              | 499    | 50  | 233    | 41 | 0      | 0  | 9,086                  | 39 |
| Planning              | 943    | 95  | 459    | 80 | 780    | 89 | 16,686                 | 72 |
| Medication management | 941    | 94  | 459    | 80 | 729    | 84 | 14,780                 | 64 |
| Hospitalization       | 0      | 0   | 59     | 10 | 0      | 0  | 2,580                  | 11 |

Appendix Table 3. Change in physical health indicators from intake to 12-month follow-up<sup>a</sup> among PBHCI consumers “at risk” for physical illness

| Indicator <sup>b</sup> | Intervention Sites (n=3) |          |       |           |       |                              | All Other Sites (n=53) |          |      |           |      |                              |
|------------------------|--------------------------|----------|-------|-----------|-------|------------------------------|------------------------|----------|------|-----------|------|------------------------------|
|                        | Both Records (N)         | Baseline |       | Follow-up |       | Mean Difference <sup>c</sup> | Both Records (N)       | Baseline |      | Follow-up |      | Mean Difference <sup>c</sup> |
|                        |                          | Mean     | SD    | Mean      | SD    |                              |                        | Mean     | SD   | Mean      | SD   |                              |
| SBP                    | 107                      | 142.0    | 11.6  | 128.3     | 14.1  | -13.77***                    | 775                    | 143.6    | 12.9 | 133.0     | 18.0 | -10.56***                    |
| DBP                    | 90                       | 92.5     | 5.8   | 80.0      | 10.5  | -12.54***                    | 636                    | 93.5     | 8.5  | 84.2      | 11.1 | -9.33***                     |
| BMI                    | 217                      | 35.2     | 9.1   | 34.5      | 8.0   | -0.68                        | 1480                   | 34.5     | 7.6  | 34.1      | 7.4  | -0.41*                       |
| TC                     | 21                       | 265.1    | 18.7  | 209.6     | 44.6  | -55.48***                    | 157                    | 267.5    | 28.3 | 232.6     | 47.3 | -34.84***                    |
| HDL C                  | 77                       | 33.2     | 4.6   | 39.3      | 9.7   | 6.06***                      | 346                    | 32.9     | 4.7  | 36.9      | 8.5  | 4.02***                      |
| LDL C                  | 65                       | 159.0    | 38.0  | 124.8     | 35.5  | -34.18***                    | 269                    | 156.0    | 23.1 | 133.8     | 36.7 | -22.15***                    |
| Trig                   | 95                       | 254.3    | 103.4 | 221.1     | 113.3 | -33.19*                      | 439                    | 238.7    | 77.8 | 205.2     | 91.2 | -33.55***                    |
| PG                     | 33                       | 1.0      | 0.0   | 0.5       | 0.5   | -0.48***                     | 371                    | 1.0      | 0.0  | 0.7       | 0.5  | -0.33***                     |
| A1c                    | 16                       | 7.8      | 3.1   | 6.7       | 1.3   | -1.10                        | 338                    | 7.0      | 1.9  | 6.6       | 1.8  | -0.34***                     |
| Smoking                | 199                      | 1.0      | 0.0   | 0.9       | 0.3   | -0.11***                     | 1141                   | 1.0      | 0.0  | 0.9       | 0.3  | -0.10***                     |

<sup>a</sup>For consumers enrolled during the (approximately) second year of grant funding: August 2010 through July 2011 for the 2009-funded grantee, and August 2011 through July 2012 for the 2010-funded grantees)

<sup>b</sup>SBP: systolic blood pressure (mmHg); DBP: diastolic blood pressure (mmHg); BMI: body mass index (kg/m<sup>2</sup>); TC: total cholesterol (mg/dL); HDL C: high-density lipoprotein cholesterol (mg/dL); LDL C: low-density lipoprotein cholesterol (mg/dL); Trig: triglycerides (mg/dL); PG: plasma glucose (proportion “at-risk”—see cutoffs in Table 2—based on fasting or non-fasting measures); A1c: hemoglobin A1c (%); Smoking: self-reported tobacco smoking in past 30 days

<sup>c</sup>Follow-up minus baseline means

\*p<.05, \*\*p<.01, \*\*\*p<.001; based on t-tests comparing baseline to follow-up means
